# Supplementary material
Source: Springer Nature journal article supplement (https://www.springermedizin.de/resource/supplementary/12885_2011_2991_MOESM2_ESM.pdf/9462434)
Supplement: MOESM2 [file 9462434]

Table1. Checklist of fast track and conventional perioperative operation treatments

| Time                   | Fast track treatment                                                                                                                                                                                                                                                                                                                                                                                                       | Conventional treatment                                                                                                                                                                   |
|------------------------|----------------------------------------------------------------------------------------------------------------------------------------------------------------------------------------------------------------------------------------------------------------------------------------------------------------------------------------------------------------------------------------------------------------------------|------------------------------------------------------------------------------------------------------------------------------------------------------------------------------------------|
| Preadmission           | -Psychological optimism                                                                                                                                                                                                                                                                                                                                                                                                    | -No psychological optimism                                                                                                                                                               |
| (After randomization)  | -Pre-assessment for risk adjustment                                                                                                                                                                                                                                                                                                                                                                                        | -Pre-assessment for risk adjustment                                                                                                                                                      |
|                        | -Anesthesiologic information of combined anesthesia consisting of thoracic epidural and general anesthesia                                                                                                                                                                                                                                                                                                                 | -No Anesthesiologic information of general anesthesia                                                                                                                                    |
|                        | -Information of the fast track treatment and the informed consent                                                                                                                                                                                                                                                                                                                                                          | -Information of the conventional treatment and the informed consent                                                                                                                      |
|                        | -Guided tour of fast track wards                                                                                                                                                                                                                                                                                                                                                                                           | -No tour                                                                                                                                                                                 |
|                        | -Operation schedule                                                                                                                                                                                                                                                                                                                                                                                                        | -Operation schedule                                                                                                                                                                      |
| Preoperation           | -Bowel preparation: semiliquid diet 1days before operation                                                                                                                                                                                                                                                                                                                                                                 | -Bowel preparation: liquid diet 1-2days before operation                                                                                                                                 |
|                        | - Enemas:                                                                                                                                                                                                                                                                                                                                                                                                                  | -Enemas:                                                                                                                                                                                 |
|                        | Polyethylene Glycol-Electrolyte Powder ® (Hengkang Zhengqing™, Jiangxi Hygecon Pharmacy CO.,Ltd, Shangrao, CN) the afternoon before surgery,2 boxes mixing with 2000ml warm drinking water                                                                                                                                                                                                                                 | Polyethylene Glycol-Electrolyte Powder ® the afternoon before surgery, 2 boxes mixing with 2000ml warm drinking water                                                                    |
|                        | -Fasting: last meal 2h before operation                                                                                                                                                                                                                                                                                                                                                                                    | -Fasting: last meal 10h before operation                                                                                                                                                 |
|                        | -Complete Enteral Nutritional Emulsion Supportan (TPF-T) ® (Supportan™, Sino-Swed Pharmaceutical CO. Ltd, Wuxi, CN) 600ml or Fresubin Diabetes (TPF-D) ® (Fresubin Diabetes™, Sino-Swed Pharmaceutical CO. Ltd, Wuxi, CN) 500ml (especially for patients with diabetes mellitus) p.o. 8h before operation                                                                                                                  | - No oral intake in the operation day                                                                                                                                                    |
|                        | - 10% Glucose 400ml p.o. 2-3h before operation                                                                                                                                                                                                                                                                                                                                                                             | - No oral intake in the operation day                                                                                                                                                    |
|                        | - Nasogastric tube 0.5h before operation for Gastrointestinal decompression                                                                                                                                                                                                                                                                                                                                                | - Nasogastric tube 0.5h before operation for Gastrointestinal decompression                                                                                                              |
| Intraoperation         |                                                                                                                                                                                                                                                                                                                                                                                                                            |                                                                                                                                                                                          |
| -Anesthetic management | - Placement of epidural catheter (T6-L1), depending on the surgical resection); test-dose (3 ml of 2% lidocaine (Hefeng™, Harvest Pharmaceutical CO. Ltd, Shanghai, CN)) followed by continuous infusion (10 ml of 0.5% or 0.75% ropivacaine (Naropin™, APP Pharmaceuticals, LLC., Schaumburg, IL) according to the age and size of the patient before surgical incision                                                   | - No thoracic epidural anesthesia                                                                                                                                                        |
|                        | - Balanced Combination with general anesthesia: intravenous midazolam (Liyuxi™, Nhwa Pharmaceutical Co., Ltd., Xuzhou, CN) (0.1 mg/kg), target-controlled infusion (TCI) of propofol (Diprivan™, AstraZeneca Pharmaceutical Co., Ltd., Shanghai, CN) (4-8 µg/ml), sufentanil (Fukang™, Humanwell Pharmaceutical Co., Ltd., Yichang, CN) (0.5-1µg/mg), rocuronium (Esmeron™, Organon Teknika B.V., Oss, NL) (0.6-0.9mg/kg). | - Normal General anesthesia: intravenous midazolam (0.1 mg/kg), target-controlled infusion (TCI) of propofol (4-8 µg/ml), sufentanil (0.5-1µg/mg), rocuronium (0.6-0.9mg/kg).            |
|                        | The patients were ventilated mechanically.                                                                                                                                                                                                                                                                                                                                                                                 | The patients were ventilated mechanically.                                                                                                                                               |
|                        | Anesthesia was maintained propofol TCI (2-4 µg/ml), remifentanil (0.02-0.03µg/kg/min) and intermittent boluses of rocuronium.                                                                                                                                                                                                                                                                                              | Anesthesia was maintained propofol TCI (2-4 µg/ml), remifentanil (Ruijie™, Humanwell Pharmaceutical Co., Ltd., Yichang, CN) (0.02-0.03µg/kg/min) and intermittent boluses of rocuronium. |
|                        |                                                                                                                                                                                                                                                                                                                                                                                                                            | As equally depth of anesthesia is also needed in conventional treatment group with no thoracic epidural anesthesia, more drug dosage of general                                          |

anesthesia is used.

|                              |                                                                                                                                                                                                                                                                                                                                                                                                                                                                                                                                                                                                                                                                                                                                                                                                            |                                                                                                                                                                                                                                                                                                                                                                                                         |
|------------------------------|------------------------------------------------------------------------------------------------------------------------------------------------------------------------------------------------------------------------------------------------------------------------------------------------------------------------------------------------------------------------------------------------------------------------------------------------------------------------------------------------------------------------------------------------------------------------------------------------------------------------------------------------------------------------------------------------------------------------------------------------------------------------------------------------------------|---------------------------------------------------------------------------------------------------------------------------------------------------------------------------------------------------------------------------------------------------------------------------------------------------------------------------------------------------------------------------------------------------------|
|                              | - Morphia as little as possible                                                                                                                                                                                                                                                                                                                                                                                                                                                                                                                                                                                                                                                                                                                                                                            | - No restriction of Morphia use                                                                                                                                                                                                                                                                                                                                                                         |
|                              | - Monitoring:<br>(Datex Ohmeda™ S/5 Anesthesia Monitor (Datex-Ohmeda Division, Instrumentarium Corp., Helsinki, Finland)) consists of electrocardiogram (ECG), heart rate (HR), respiratory rate, arterial pressure (BP), SpO2, end-tidal CO2 (etCO2), and bispectral index (BIS).<br>- The target concentration of propofol: keep BIS between 40 and 60 to maintain adequate hypnosis.<br>- Perioperative hypotension: systolic blood pressure (SBP) < 80 mmHg or a decrease of 30% baseline value and was treated with reduction of anesthetics, fluid supplement, and a bolus dose of ephedrine (Mahuangsu™, Northeast Pharmaceutical Co., Ltd., Shenyang, CN) (10mg, IV). If SBP was above 160 mmHg or increase >30%, an increase of propofol or remifentanyl infusion was given to deepen anesthesia. | - Monitoring: the same as fast-track group                                                                                                                                                                                                                                                                                                                                                              |
| -Antibiotic prophylaxis      | - Yes,                                                                                                                                                                                                                                                                                                                                                                                                                                                                                                                                                                                                                                                                                                                                                                                                     | - Yes                                                                                                                                                                                                                                                                                                                                                                                                   |
| -Surgical management         | -Laparoscopic/open surgery as randomization                                                                                                                                                                                                                                                                                                                                                                                                                                                                                                                                                                                                                                                                                                                                                                | -Laparoscopic/open surgery as randomization                                                                                                                                                                                                                                                                                                                                                             |
| - Warming                    | - Yes, body warming by thickening quilt as well as intravenous fluid warming                                                                                                                                                                                                                                                                                                                                                                                                                                                                                                                                                                                                                                                                                                                               | - No body and intravenous fluid warming                                                                                                                                                                                                                                                                                                                                                                 |
| - Drains                     | - Minimal use and early removal of abdominal drains                                                                                                                                                                                                                                                                                                                                                                                                                                                                                                                                                                                                                                                                                                                                                        | -Regularly use and removal of abdominal drains                                                                                                                                                                                                                                                                                                                                                          |
| - Fluid infusion             | - Totally ≤ 1500ml during operation                                                                                                                                                                                                                                                                                                                                                                                                                                                                                                                                                                                                                                                                                                                                                                        | - No restriction                                                                                                                                                                                                                                                                                                                                                                                        |
| <hr/>                        |                                                                                                                                                                                                                                                                                                                                                                                                                                                                                                                                                                                                                                                                                                                                                                                                            |                                                                                                                                                                                                                                                                                                                                                                                                         |
| Postoperation                |                                                                                                                                                                                                                                                                                                                                                                                                                                                                                                                                                                                                                                                                                                                                                                                                            |                                                                                                                                                                                                                                                                                                                                                                                                         |
| - Pain management            | -Patient-controlled continuous epidural analgesia with a 5ml/h continuous infusion of 0.15% ropivacaine and a bolus dose of 2.5ml (locktime 15min) until 48h after operation, paracetamol (Tylenol™, Johnson & Johnson Pharmaceutical Co., Ltd., Shanghai, CN) p.o. when needed                                                                                                                                                                                                                                                                                                                                                                                                                                                                                                                            | -Patient-controlled intravenous analgesia with a 4ug/h continuous infusion of sufentanil and a bolus dose of 1.5ug (locktime 15min)<br><br>-Bucinperazine (Qiangtongding™, Northeast Pharmaceutical Co., Ltd., Shenyang, CN) or Morphine (Mafei™, Northeast Pharmaceutical Co., Ltd., Shenyang, CN) intramuscular injection when patient-controlled intravenous analgesia isn't enough for pain control |
| - Diet                       | - Chewing gum 1 piece tid p.o.<br><br>- At least 10% Glucose 200ml p.o. within 24h after operation<br><br>-Liquid diet and Enteral Nutritional Emulsion Supportan 200ml or Fresubin Diabetes 300ml (especially for patients with diabetes mellitus) p.o. the next day of operation<br><br>- Diet rehabilitation as early as possible (dose increase of Enteral Nutritional Emulsion or when needed)                                                                                                                                                                                                                                                                                                                                                                                                        | -No chewing gum<br><br>- Fasting until flatus<br><br>- Liquid diet after flatus<br><br>- Normal diet after defecation                                                                                                                                                                                                                                                                                   |
| - Intravenous fluid infusion | - Stop intravenous high energy fluid infusion after dosage of Enteral Nutritional Emulsion Supportan ≥ 600ml or Enteral Nutritional Emulsion Fresubin Diabetes ≥ 500ml                                                                                                                                                                                                                                                                                                                                                                                                                                                                                                                                                                                                                                     | - Intravenous high energy fluid infusion on daily basis and continuing until adequate oral intake                                                                                                                                                                                                                                                                                                       |

|                                          |                                                                                                                                    |                                                                                                                                                                                                                                                                                                                                                                |
|------------------------------------------|------------------------------------------------------------------------------------------------------------------------------------|----------------------------------------------------------------------------------------------------------------------------------------------------------------------------------------------------------------------------------------------------------------------------------------------------------------------------------------------------------------|
|                                          | - No intravenous High-energy Nutrient Fluid after 72h post-surgery                                                                 |                                                                                                                                                                                                                                                                                                                                                                |
|                                          | - Restricting and avoiding excessive intravenous fluid infusion, keeping body weight as pre-surgery                                |                                                                                                                                                                                                                                                                                                                                                                |
| - Energy                                 | - Keep the total energy intake (both diet and intravenous fluid infusion) 25-30kcal/kg/day                                         | - Keep the total energy intake (both diet and intravenous fluid infusion) 25-30kcal/kg/day                                                                                                                                                                                                                                                                     |
| - Nasogastric tube and urethral catheter | - Remove nasogastric tube as soon as the end of operation                                                                          | - Remove nasogastric tube after 1st flatus postoperation                                                                                                                                                                                                                                                                                                       |
|                                          | - Remove urethral catheter within 24-48h after operation                                                                           | - Remove urethral catheter when 1 <sup>st</sup> time meet: patient have the feeling of automatic micturition and $\geq 200$ ml after valving-on urethral catheter                                                                                                                                                                                              |
| - Ambulation                             | - Forced ambulation within 24h post-surgery, no time restriction                                                                   | - No ambulation scheme                                                                                                                                                                                                                                                                                                                                         |
|                                          | - Ambulation time $\geq 1$ h per day, and increasing day by day                                                                    |                                                                                                                                                                                                                                                                                                                                                                |
|                                          | - Patients walking to weight themselves every day                                                                                  |                                                                                                                                                                                                                                                                                                                                                                |
| Adjuvant chemotherapy                    | - Xelox                                                                                                                            | - mFolfox6                                                                                                                                                                                                                                                                                                                                                     |
|                                          | - repeat every 3 weeks for 8 cycles                                                                                                | - repeat every 2 weeks for 12 cycles                                                                                                                                                                                                                                                                                                                           |
|                                          | - Regimen                                                                                                                          | - Regimen                                                                                                                                                                                                                                                                                                                                                      |
|                                          | Oxaliplatin 130 mg/ m <sup>2</sup> day 1, Capecitabine (Xeloda <sup>TM</sup> ) 850-1000 mg/ m <sup>2</sup> twice daily for 14 days | Oxaliplatin (Eloxatin <sup>TM</sup> ) 85 mg/m <sup>2</sup> IV over 2 hours, day 1<br>Leucovorin (Tongao <sup>TM</sup> ) 400 mg/ m <sup>2</sup> IV over 2 hours, day 1<br>5-FU (Jinyao <sup>TM</sup> ) 400 mg/ m <sup>2</sup> IV bolus on day 1, then 1200 mg/ m <sup>2</sup> /day x 2 days (total 2400 mg/m <sup>2</sup> over 46-48 hours) continuous infusion |
|                                          | - No peripherally inserted central catheter (PICC)                                                                                 | - Peripherally inserted central catheter and care of PICC in outpatient clinic every week                                                                                                                                                                                                                                                                      |
|                                          | - Hospitalization no more than 24h each cycle                                                                                      | - Hospitalization for 3 days each cycle                                                                                                                                                                                                                                                                                                                        |
